# Supplementary material
Source: Springer Nature journal article supplement (https://www.springermedizin.de/resource/supplementary/12889_2012_5347_MOESM4_ESM.pdf/9495182)
Supplement: MOESM4 [file 9495182]

Figure 4:

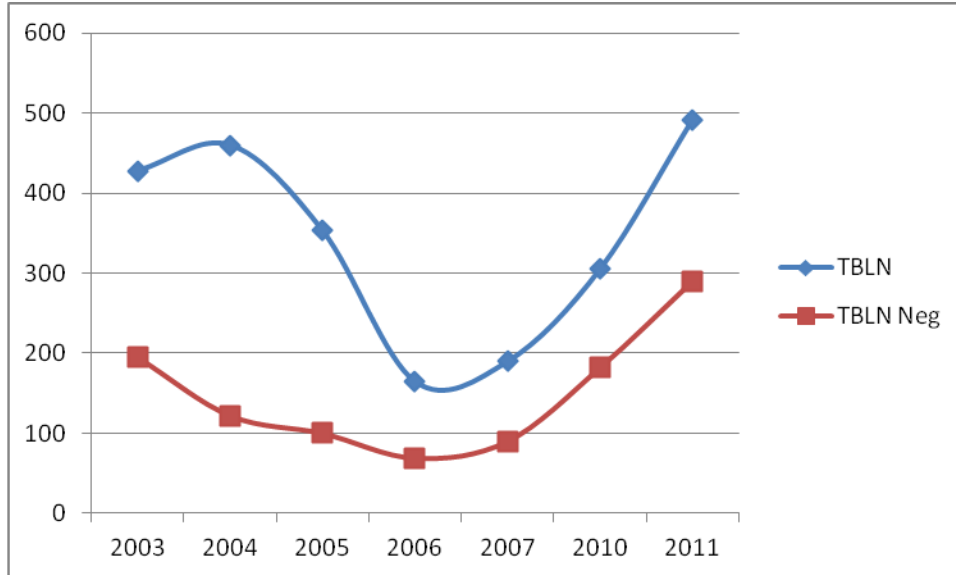

Figure 4: Trend prevalence of tuberculosis lymphadenitis among patients with lymph node aspirate in Gondar University Hospital from January, 2003– January, 2007 and January, 2010– January, 2011 G.C.
